# Supplementary material
Source: publisher figshare collection journal article supplement (https://karger.figshare.com/articles/dataset/_/16573370)
Supplement: Supplementary file 1 [file 1]

Supplementary Fig. 1. TTP and OS according to AFP response. TTP (fig. 1A) and OS (fig. 1B) in patients with AFP response (n=10) defined as decline by at least 50% after start of treatment (red lines) and patients without AFP response (n=11) (blue lines). Only patients with baseline AFP of at least 20 ng/mL and at least 1 AFP measurement on treatment were evaluable for AFP response (n=21).
